# Supplementary material for: A novel method for textile odor removal using engineered water nanostructures
Source: Royal Society of Chemistry journal article supplement (doi:10.1039/c9ra01988j), 2019-01-01
Supplement: c9ra01988j1.pdf [file c9ra01988j1.pdf]

## Supplementary material

This supporting information contains:

**Table S.1** The Area Peak Value of Nicotine tested from GC-MS.

**Table S.2** The Area Peak Value of Linalool tested from GC-MS.

**Table S.3** The Area Peak Value of Anethole tested from GC-MS.

**Table S.4** The Area Peak Value of Isovaleric Acid tested from GC-MS.

**Table S.1** The Area Peak Value of Nicotine tested from GC-MS.

| <b>Control groups</b>     | <b>1</b> | <b>2</b> | <b>3</b> | <b>Average</b> |
|---------------------------|----------|----------|----------|----------------|
| 0h (Original sample)      | 30659749 | 30973049 | 31163081 | 32507093       |
| 1h                        | 30693269 | 30011590 | 30770757 | 30931960       |
| 3h                        | 30776113 | 30177860 | 30716228 | 30556734       |
| 5h                        | 29798143 | 30254333 | 29350408 | 29800961       |
| <b>Experimental group</b> | <b>1</b> | <b>2</b> | <b>3</b> | <b>Average</b> |
| 0h (Original sample)      | 30659749 | 30973049 | 31163081 | 32507093       |
| 1h                        | 24724067 | 26411621 | 25032783 | 25389490       |
| 3h                        | 3677312  | 4189219  | 4600259  | 4155597        |
| 5h                        | 1422180  | 1489942  | 1422079  | 1444734        |

**Table S.2** The Area Peak Value of Linalool tested from GC-MS.

| <b>Control groups</b>     | <b>1</b> | <b>2</b> | <b>3</b> | <b>Average</b> |
|---------------------------|----------|----------|----------|----------------|
| 0h (Original sample)      | 10528523 | 12854835 | 12656117 | 12013158       |
| 1h                        | 9894560  | 10417587 | 9280082  | 9864076        |
| 3h                        | 9917821  | 8330542  | 7718116  | 8655493        |
| 5h                        | 6072159  | 6377930  | 6259709  | 6236599        |
| <b>Experimental group</b> | <b>1</b> | <b>2</b> | <b>3</b> | <b>Average</b> |
| 0h (Original sample)      | 10528523 | 12854835 | 12656117 | 12013158       |
| 1h                        | 7883673  | 7477836  | 8584589  | 7982033        |
| 3h                        | 3567053  | 4411980  | 3950561  | 3976531        |
| 5h                        | 0        | 0        | 0        | 0              |

**Table S.3** The Area Peak Value of Anethole tested from GC-MS.

| <b>Control groups</b>     | <b>1</b> | <b>2</b> | <b>3</b> | <b>Average</b> |
|---------------------------|----------|----------|----------|----------------|
| 0h (Original sample)      | 5268169  | 6153335  | 6447765  | 5956423        |
| 1h                        | 5262420  | 5856076  | 4689690  | 5269395        |
| 3h                        | 4595678  | 4776591  | 4073087  | 4481785        |
| 5h                        | 4397303  | 4417690  | 4590860  | 4468618        |
| <b>Experimental group</b> | <b>1</b> | <b>2</b> | <b>3</b> | <b>Average</b> |
| 0h (Original sample)      | 5268169  | 6153335  | 6447765  | 5956423        |
| 1h                        | 4498254  | 4146793  | 4885463  | 4510170        |
| 3h                        | 2381093  | 3016515  | 2621150  | 2672919        |
| 5h                        | 0        | 0        | 0        | 0              |

**Table S.4** The Area Peak Value of Isovaleric Acid tested from GC-MS.

| <b>Control groups</b>     | <b>1</b>  | <b>2</b>  | <b>3</b>  | <b>Average</b> |
|---------------------------|-----------|-----------|-----------|----------------|
| 0h (Original sample)      | 237090920 | 232827376 | 213880899 | 227933065      |
| 1h                        | 203078454 | 204315002 | 207594942 | 204996133      |
| 3h                        | 194456561 | 196222998 | 186717088 | 192465549      |
| 5h                        | 166049721 | 168842358 | 173866648 | 169586242      |
| <b>Experimental group</b> | <b>1</b>  | <b>2</b>  | <b>3</b>  | <b>Average</b> |
| 0h (Original sample)      | 237090920 | 232827376 | 213880899 | 227933065      |
| 1h                        | 162918540 | 157148751 | 157724637 | 159263976      |
| 3h                        | 156546483 | 150029427 | 142456675 | 149677528      |
| 5h                        | 127590863 | 135400092 | 121993756 | 128328237      |
